# Supplementary material for: Thermal-assisted gasification injector for analyzing high-salt solution samples: a novel device developed for online coupling of liquid chromatography with direct analysis in real time mass spectrometry
Source: Royal Society of Chemistry journal article supplement (doi:10.1039/c6ra12712f), 2016-01-01
Supplement: c6ra12712f1.pdf [file c6ra12712f1.pdf]

## Supplementary Information

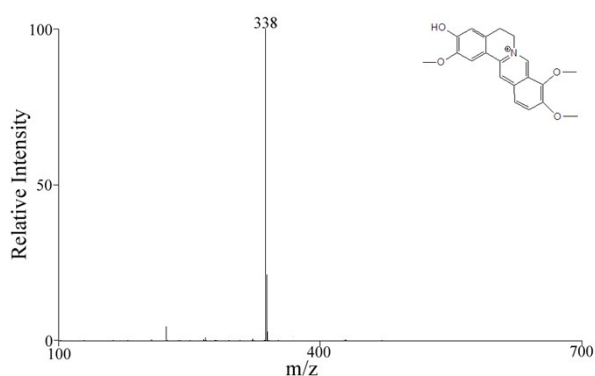

Figure S1. The mass spectrum and chemical structural formula of jatrorrhizine from TAG-DART-MS in positive ion mode

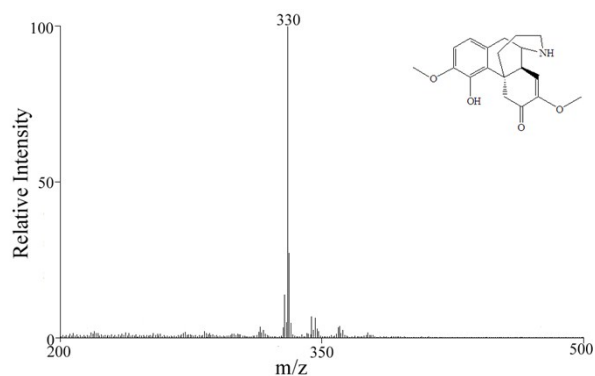

Figure S2. The mass spectrum and chemical structural formula of sinomenine from TAG-DART-MS in positive ion mode

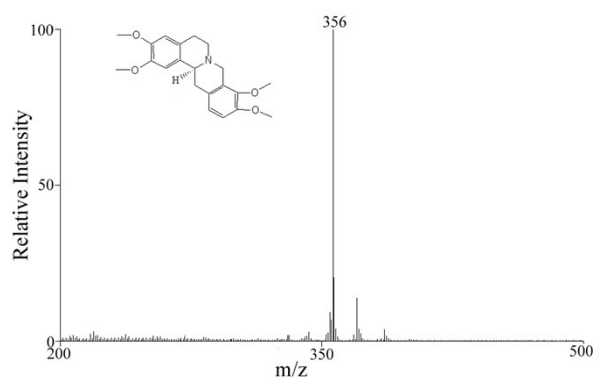

Figure S3. The mass spectrum and chemical structural formula of rotundine from TAG-DART-MS in positive ion mode

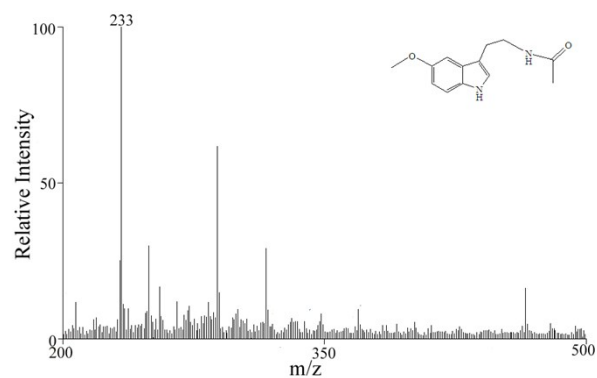

Figure S4. The mass spectrum and chemical structural formula of melatonin from TAG-DART-MS in positive ion mode

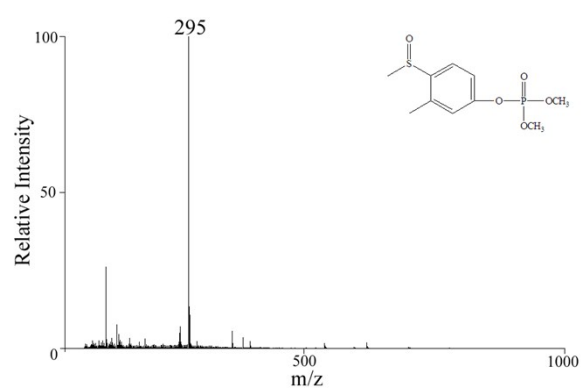

Figure S5. The mass spectrum and chemical structural formula of fenthion-sulfoxide from TAG-DART-MS in positive ion mode

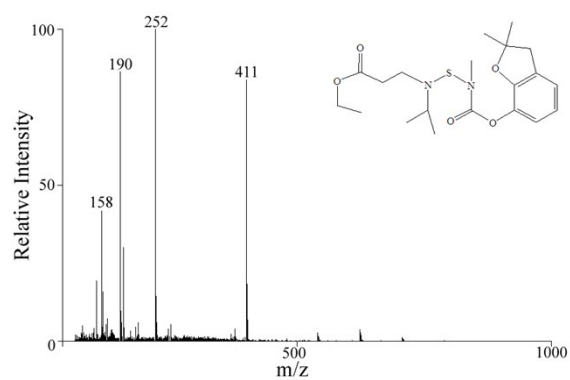

Figure S6. The mass spectrum and chemical structural formula of benfuracarb from TAG-DART-MS in positive ion mode

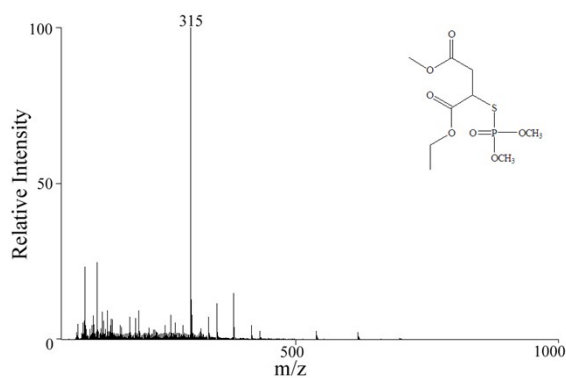

Figure S7. The mass spectrum and chemical structural formula of malaoxon from TAG-DART-MS in positive ion mode

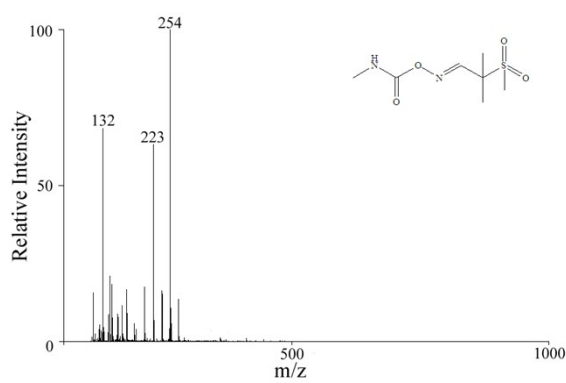

Figure S8. The mass spectrum and chemical structural formula of aldicarb sulfone from TAG-DART-MS in positive ion mode

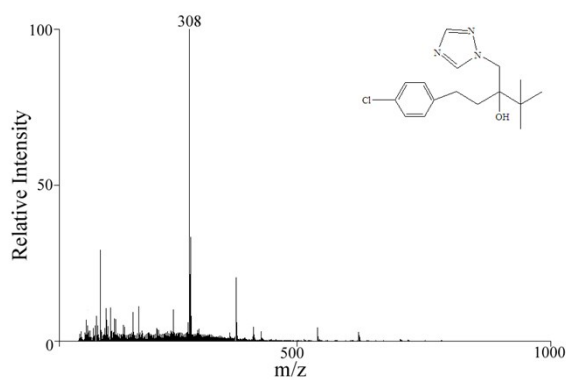

Figure S9. The mass spectrum and chemical structural formula of tebuconazole from TAG-DART-MS in positive ion mode

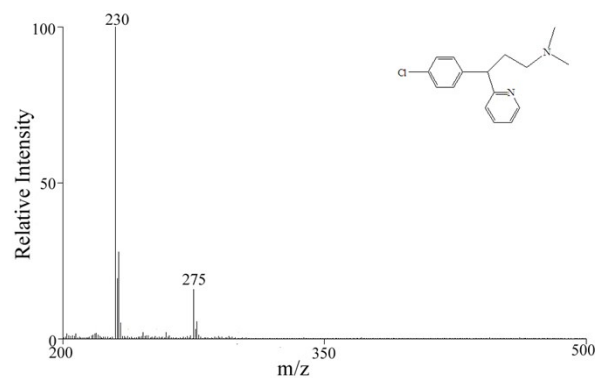

Figure S10. The mass spectrum and chemical structural formula of chlorpheniramine from TAG-DART-MS in positive ion mode

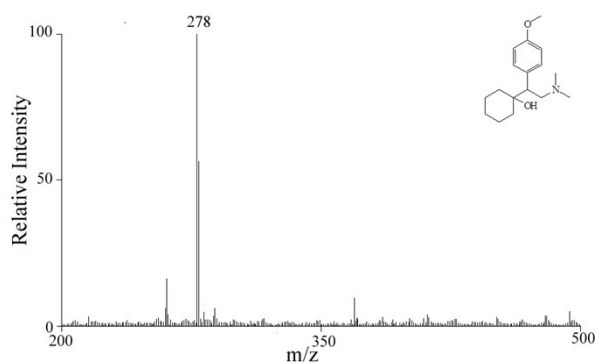

Figure S11. The mass spectrum and chemical structural formula of venlafaxine from TAG-DART-MS in positive ion mode

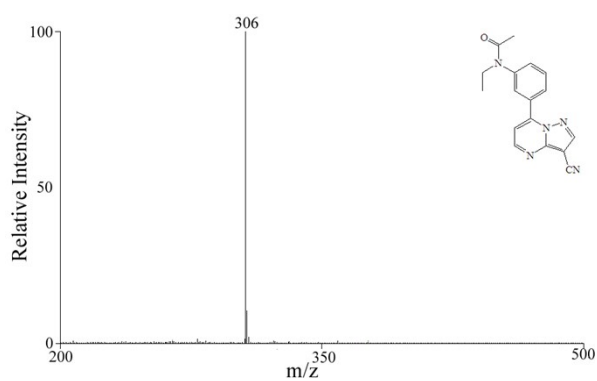

Figure S12. The mass spectrum and chemical structural formula of zaleplon from TAG-DART-MS in positive ion mode

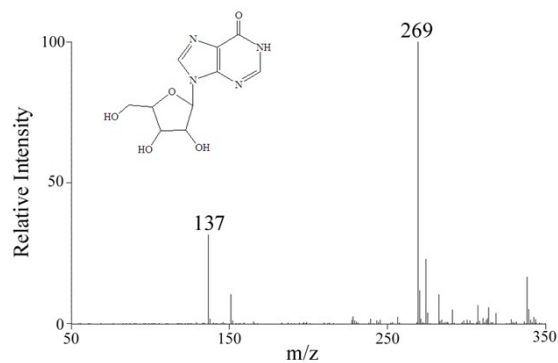

Figure S13. The mass spectrum and chemical structural formula of inosine from TAG-DART-MS in positive ion mode

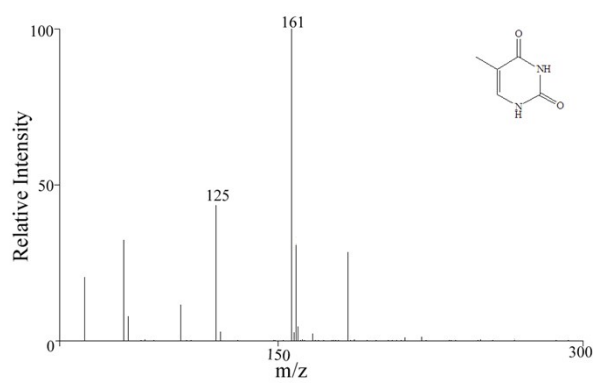

Figure S14. The mass spectrum and chemical structural formula of thymine from TAG-DART-MS in negative ion mode

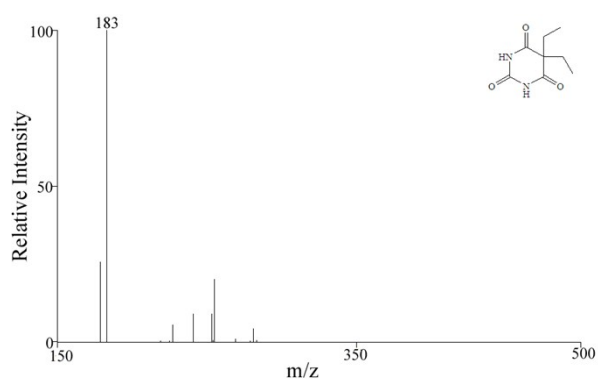

Figure S15. The mass spectrum and chemical structural formula of barbital from TAG-DART-MS in negative ion mode

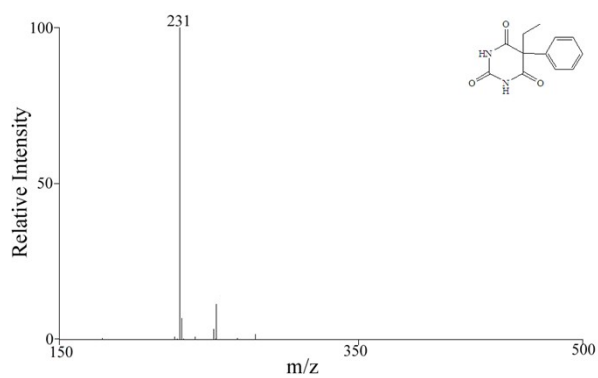

Figure S16. The mass spectrum and chemical structural formula of phenobarbital from TAG-DART-MS in negative ion mode

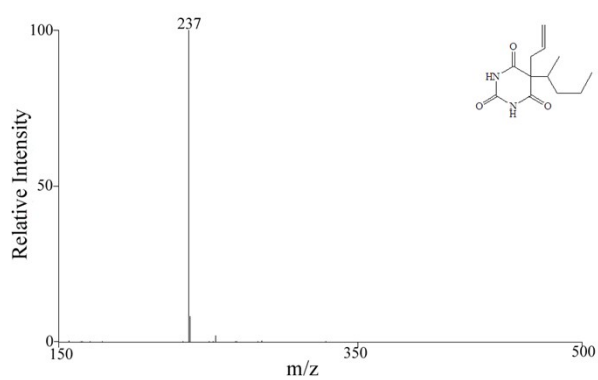

Figure S17. The mass spectrum and chemical structural formula of secobarbital from TAG-DART-MS in negative ion mode

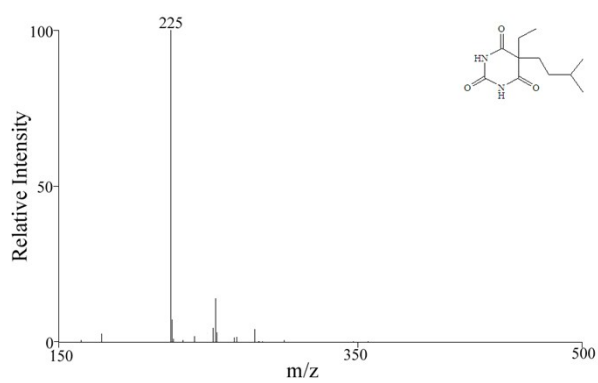

Figure S18. The mass spectrum and chemical structural formula of amobarbital from TAG-DART-MS in negative ion mode
